# Supplementary material for: Mosaic of Anodic Alumina Inherited from Anodizing of Polycrystalline Substrate in Oxalic Acid
Source: MDPI journal article supplement (doi:10.3390/nano12244406), 2022-12-10
Supplement: s1 [file s1]

## Supplementary material

# Mosaic of Anodic Alumina Inherited from Anodizing of Polycrystalline Substrate in Oxalic Acid

Sergey E. Kushnir <sup>1,2,\*</sup>, Mikhail E. Kuznetsov <sup>1</sup>, Ilya V. Roslyakov <sup>2,3</sup>, Nikolay V. Lyskov <sup>4,5</sup>  
and Kirill S. Napolskii <sup>1,2</sup>

<sup>1</sup> Department of Chemistry, Lomonosov Moscow State University, Moscow 119991, Russia

<sup>2</sup> Department of Materials Science, Lomonosov Moscow State University, Moscow 119991, Russia

<sup>3</sup> Kurnakov Institute of General and Inorganic Chemistry RAS, Moscow 119991, Russia

<sup>4</sup> Federal Research Center of Problems of Chemical Physics and Medical Chemistry RAS,  
Chernogolovka, Moscow region 142432, Russia

<sup>5</sup> Department of Physics, National Research University "Higher School of Economics", Moscow  
101000, Russia

\* Correspondence: kushnir@elch.chem.msu.ru

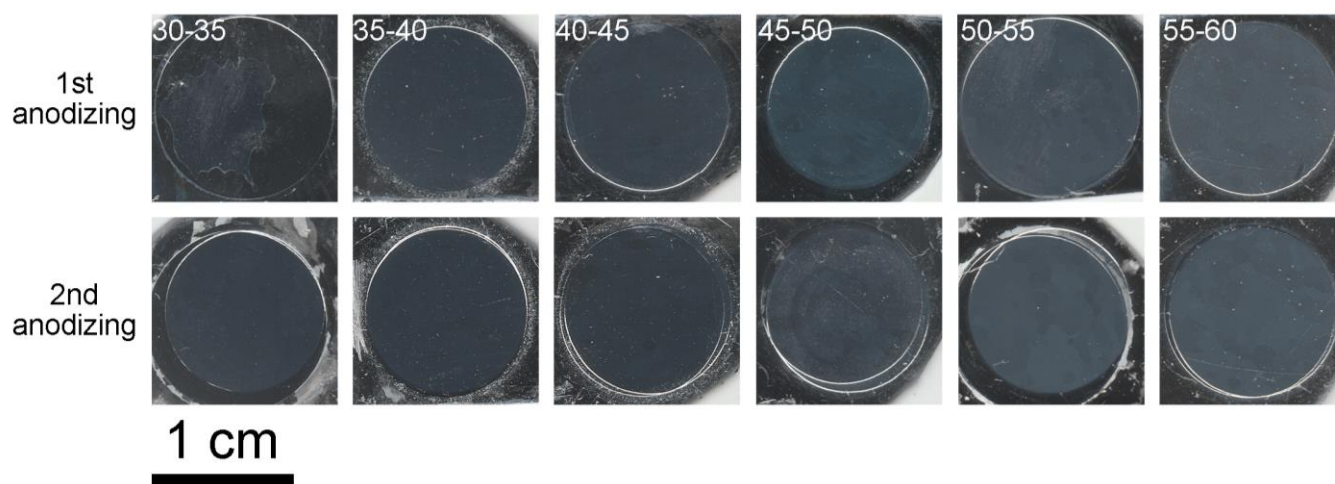

**Figure S1.** Scanned images of AAO 1D PhCs. The sample names are shown in the upper left corner of the images.

**Table S1.** Anodizing area (cm<sup>2</sup>) of prepared anodic aluminium oxide one-dimensional photonic crystals.

|               | 30-35 | 35-40 | 40-45 | 45-50 | 50-55 | 55-60 |
|---------------|-------|-------|-------|-------|-------|-------|
| 1st anodizing | 1.250 | 1.063 | 1.039 | 1.000 | 1.213 | 1.125 |
| 2nd anodizing | 0.986 | 1.092 | 1.088 | 1.021 | 1.031 | 1.100 |

**Table S2.** The ratio ( $r_{wd}$ ) of the  $\lambda_{PBG}$  values for wet and dry samples over the entire sample area of prepared anodic aluminium oxide one-dimensional photonic crystals.

|       | $r_{wd}$ | standard<br>deviation<br>of $r_{wd}$ |
|-------|----------|--------------------------------------|
| 30-35 | 1.0257   | 0.0005                               |
| 35-40 | 1.0214   | 0.0005                               |
| 40-45 | 1.0224   | 0.0005                               |
| 45-50 | 1.0225   | 0.0007                               |
| 50-55 | 1.0230   | 0.0003                               |

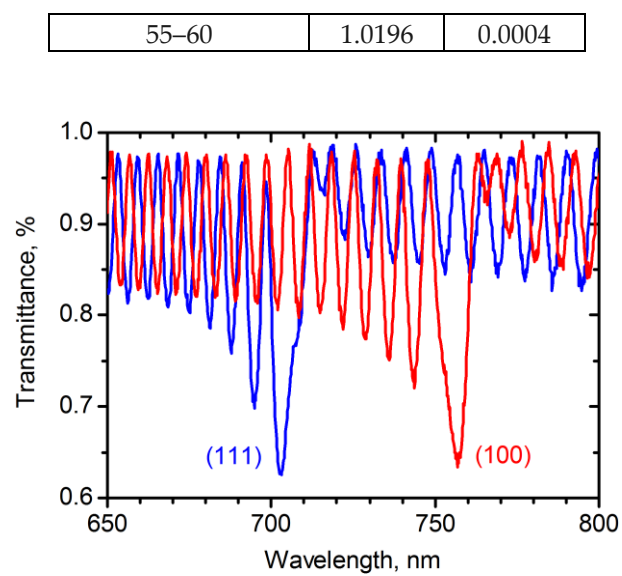

**Figure S2.** Transmittance spectra of sample 30–35 measured in the spots grown on grains close to Al(100) and Al(111).
